# Supplementary material
Source: publisher figshare collection journal article supplement (https://asha.figshare.com/articles/dataset/_/23114924)
Supplement: Supplementary file 1 [file 1]

## Supplemental Material S1. Sociodemographic question items.

Questions from the background and information questionnaire completed by parents and from which variables in the current study were created are below:

**Sex:** Child's sex:

- ☐ Male
- ☐ Female

**Race/ethnicity:** Race/ethnicity (check all that apply):

White/Caucasian  
 Black/African American  
 American Indian/Native Alaskan  
 Asian Hawaiian/Pacific Islander  
 Hispanic/Latino  
 Other: \_\_\_\_\_

**Highest parent education:** Please select the highest level of education completed for the parent/guardian (who is filling out this form):

- ☐ Elementary/Middle School
- ☐ High School
- ☐ College Undergraduate
- ☐ Graduate/Professional

**Language(s) spoken:** Language(s) spoken/understood by child: \_\_\_\_\_

**Receptive language:** How would you compare your child's ability to understand language or things that you tell them compared to his or her classmates and/or siblings?

| Much worse |   | Somewhat worse |   | About the same |   | Somewhat better |   | Much better |   |    |
|------------|---|----------------|---|----------------|---|-----------------|---|-------------|---|----|
| 0          | 1 | 2              | 3 | 4              | 5 | 6               | 7 | 9           | 9 | 10 |
|            |   |                |   |                |   |                 |   |             |   |    |

**Expressive language:** How would you compare your child's ability to express themselves and explain things compared to his or her classmates and/or siblings?

| Much worse |   | Somewhat worse |   | About the same |   | Somewhat better |   | Much better |   |    |
|------------|---|----------------|---|----------------|---|-----------------|---|-------------|---|----|
| 0          | 1 | 2              | 3 | 4              | 5 | 6               | 7 | 9           | 9 | 10 |
|            |   |                |   |                |   |                 |   |             |   |    |
